# Supplementary material for: Shifting towards prevention in the National Health Service (NHS) in Wales: Use of programme budgeting and marginal analysis (PBMA) as a framework for resource allocation in type 2 diabetes prevention and treatment
Source: Research Square preprint supplement (doi:10.21203/rs.3.rs-8138716/v1), 2026-02-16
Supplement: Supplementary file 1 [file 830582f357bfa5fac71408ec.docx]

**Supplementary File**

**PBMA Panel terms of reference**

| **Cardiff and Vale University Health Board**  **Maximising Health Outcomes in Type 2 Diabetes Panel**  **Terms of Reference** | |
| --- | --- |
| **Date:** 20/06/2024 | **Version:** 1 |
| **Background:**  In 2022, a recommendation was made in the annual report of the Director of Public Health for Cardiff and Vale UHB to ‘Consider the use of Programme Budgeting and Marginal Analysis (PBMA) as a tool to help shift funding from low-value to high-value interventions and move funding upstream towards prevention’. PBMA is a transparent, consultative decision-making framework that can be used by those planning services to maximise health outcomes by reallocating resources. It is not a new method; it has been used successfully at both national and local level in Wales and around the UK[[1]](#endnote-2),[[2]](#endnote-3). By implementing PBMA, organisations can make consultative, informed and evidence-based decisions about resource allocation, ensuring that limited resources are effectively and efficiently utilised to achieve desired outcomes. Type 2 diabetes has been identified by Cardiff and Vale UHB as a suitable programme to trial the use of PBMA in the Health Board. This group constitutes an expert panel for working through the PBMA process, facilitated by the [Centre for Health Economics and Medicines Evaluation](https://cheme.bangor.ac.uk/) (CHEME), Bangor University.  **Aim:**  To maximise health outcomes in type 2 diabetes by producing recommendations for shifting funding from low-value to high-value interventions and to move funding upstream towards prevention. | |
| **Purpose of the series of three panel meetings is to:**   - Identify what is currently working well and not working well in the diabetes pathway - Request candidate interventions for resource reallocation - Determine decision-making criteria for resource allocation (e.g. clinical effectiveness, cost-effectiveness, reducing health inequalities, alignment with government policy, etc) - Discuss and decide on candidate interventions for resource allocation - Produce an evidence booklet for suggested candidate interventions - Complete a priority ranking exercise to provide CaV UHB with a direction of travel via a set of recommendations as a result of the process | |
| **Membership:**  **Voting members:**   1. Executive Director of Public Health (*Chair*) 2. GP and Clinical Director for Diabetes, PCIC 3. Consultant Physician and Diabetologist 4. Costing and Value Senior Business Partner, Finance 5. Independent Member (Vice-Chair) 6. Pharmacist Prescribing Advisor 7. All Wales Dietetic Lead for Diabetes (Adult) / Dietetic Lead for AWDPP 8. Public Health Consultant/Registrar 9. Head of Nutrition and Dietetics 10. Director of Integrated Health and Social Care 11. Children’s Specialist Nurse for Diabetes 12. Consultant Physician Diabetes / National Strategic Clinical Network for Diabetes Chair 13. Podiatry Professional Lead / Lead for Diabetic Foot Services / National Rep. 14. Consultant Paediatrician / Clinical Lead for Paediatric Diabetes 15. Patient Representative 16. Health Systems Engagement Manager, Diabetes UK Cymru 17. Nurse Lead Diabetes   **Non-voting members:**   1. Administrative support 2. Senior Communication and Engagement Officer 3. Co-Director, Centre for Health Economics and Medicines Evaluation, Bangor University 4. Research Fellow, Centre for Health Economics and Medicines Evaluation, Bangor University 5. Research Project Support Officer, Centre for Health Economics and Medicines Evaluation, Bangor University | |
| **Frequency of meetings:**   - Meetings will be held three times between July to October 2024. | |
| **Reporting to:**   - Cardiff and Vale University Health Board Diabetes Programme Board   **Governance Structure:**  The group is a workstream under the new Diabetes Strategic Programme Board.  **Figure 1.** Governance structure of the PBMA Panel  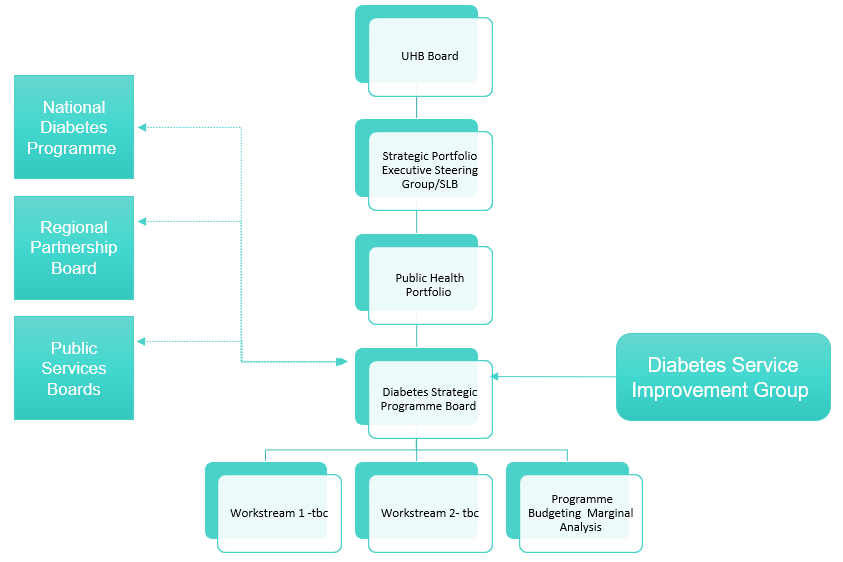 | |

**Summary of candidate costs, benefits and evidence of cost savings**

**Table 1.** Summary of candidate costs, benefits and evidence of cost savings

| **Candidates** | **Costs** | **Benefits** | **Potential cost savings** |
| --- | --- | --- | --- |
| T2D Structured Education for CYP and their families | **£249,043/year**   - design of workbooks, resources and curriculum | - prevent progression and aggressive complications - helps to prevent the type 2 diabetes progression | - long term cost-saving due to prevention/reversal of diabetes and comorbidities |
| Additional community DSNs to conduct medication reviews | **£504,543 per year**   - salary of band 7 Diabetic Specialist Nurses | - ensuring safety by avoiding drug related adverse effects - supporting patients to consider the most appropriate medication at the right dose with regular review | - reducing medicine wastage - reducing variation in prescription - avoiding frequent GP consultations - improved medicine optimisation |
| Additional clinical space for the Community Diabetes Hub in Central Cardiff | **£122,138/year**   - staff salary of a receptionist, healthcare worker, rent, utilities, cleaning | - integrated pathway between primary and secondary care - providing a one-stop-shop for patients - central hub for multi-disciplinary team | - reduced referrals to secondary care, number of adverse health events avoided such as long-term vascular events. |
| Extension of AWDPP to three additional clusters | **£191,136/year**   - staff salaries, Hba1c tests, Phlebotomy tests, etc | - reducing weight, increasing physical activity and improving the diet of those at high risk - reduce the incidence of type 2 diabetes | - Research shows that AWDPP is more effective and less costly than usual care (Harris et al., 2019) |
| Additional DSNs in perioperative care | **£466,419 per year**   - staffing cost of 8.8 DSNs | - reduce length of stay. - reduce cancellations - improve patient safety through staff and patient education | - reduce length of stay and bed days to range of 1.2 – 4.2 days resulting in a savings from £612,000-£2,142,000. |
| National Exercise Referral Scheme (NERS) pathway for people with prediabetes | **£133,800 per year**   - salaries of two exercise professionals - room hire costs | - increased physical activity and healthy lifestyle changes - prevent or delay the onset of type 2 diabetes | - prevention/reversal of type 2 diabetes and related comorbidities |

**Indicative costs of 6 evidence-based options**

**Figure 2.** Benefits and cost saving of T2D Structured Education for CYP and families


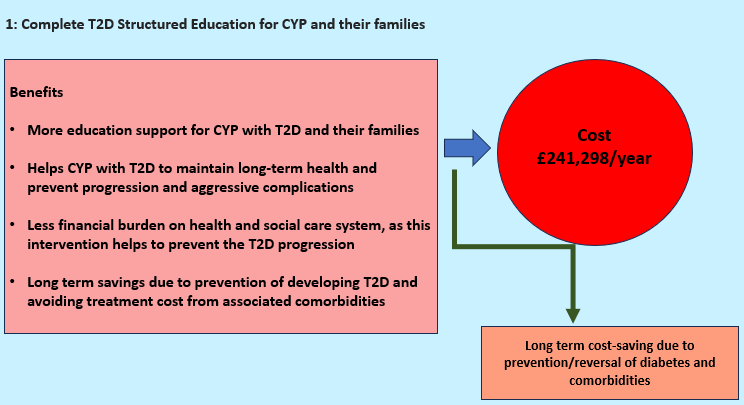


**Table 2.** Indicative costs of T2D Structured Education for CYP and families

| **Indicative cost of T2D Structured Education for CYP and families (plus case finding)** | |
| --- | --- |
| Children population in Cardiff and Vale University Health Board (Wales stats 2023) | £92,049 |
| Number of children aged 10-15 | £37,195 |
| Assuming 10% of the children need to do screening | 3720 |
| Cost of Hba1c test | £33 |
| Total cost for Screening | £122,760 |
| Salary of 2 Band 5 nurse | £92,650 |
| Administrator cost | £10,000 |
| Management support | £8,000 |
| Structured Diabetes Education | £5,600 |
| Evaluation cost | £10,000 |
| Annual Total cost | £249,043 |

**Figure 3.** Benefits and cost saving of Medicines Optimisation


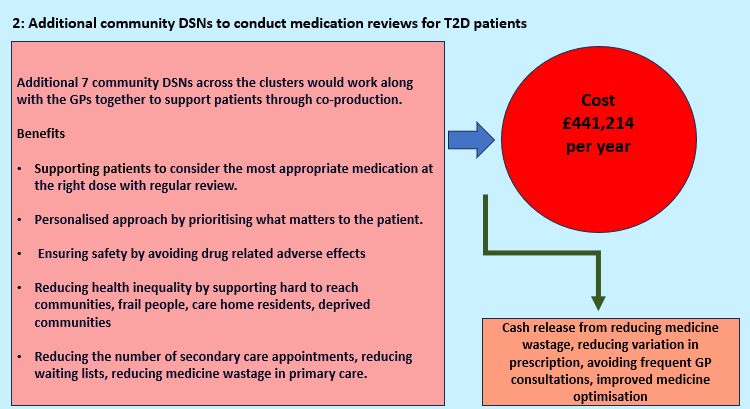


**Table 3.** Indicative costs Medicines Optimisation

| **Indicative cost for Medicines Optimisation** | |
| --- | --- |
| Salary of Band 7 DSN - | £67,649 |
| Travel cost | £2,000 |
| Training | £1,000 |
| Total cost for 1 DSN | £70,649 |
| Total cost for 7 DSNS | £49,4543 |
| Monitoring | £10,000 |
| Total Annual cost | £504,543 |

**Figure 4.** Benefits and cost saving of Community Clinic space


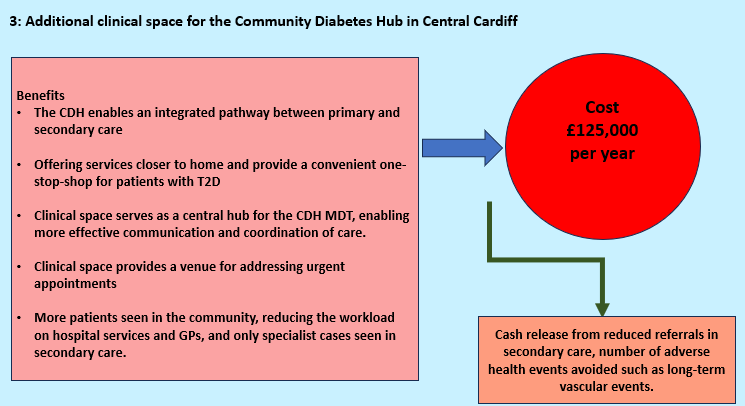


**Table 4.** Indicative costs for Community Clinic space

| **Indicative cost for Community Clinic space** | |
| --- | --- |
| Staff Salaries (Receptionist, plus administrator) | £64,138 |
| Rent and Utilities | £10,000 |
| Medical Equipment and Supplies | £10,000 |
| Pharmacy services | £10,000 |
| Facility Maintenance and Cleaning | £10,000 |
| Laptop cost | £3,000 |
| IT support | £5,000 |
| Evaluation Costs | £10,000 |
| Total Annual Cost | £122,138 |

**Figure 5.** Benefits and cost saving of extension of AWDPP to 3 new Clusters


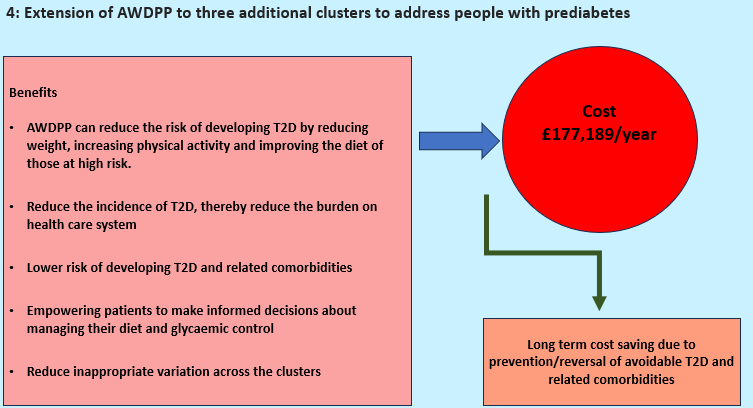


**Table 5.** Indicative costs for extension of AWDPP to 3 new Clusters

| **Indicative cost for extension of AWDPP to 3 new Clusters** | |
| --- | --- |
| Staff costs 0.25 wte Dietitian (Band 7) | £16,912 |
| 1 Health Care Support Worker (Band 3) | £30,813 |
| Staff total | £47,725 |
| Accommodation/ contingency | £7,143 |
| HbA1c lab test | £2,662 |
| HbA1c phlebotomy | £3,300 |
| Stationary/postage | £2,882 |
| Delivery total | £15,987 |
| Cost per cluster | £63,712 |
| Grand total per annum for additional 3 clusters | £191,136 |

**Figure 6.** Benefits and cost saving of additional 8.8 DSNs perioperative care


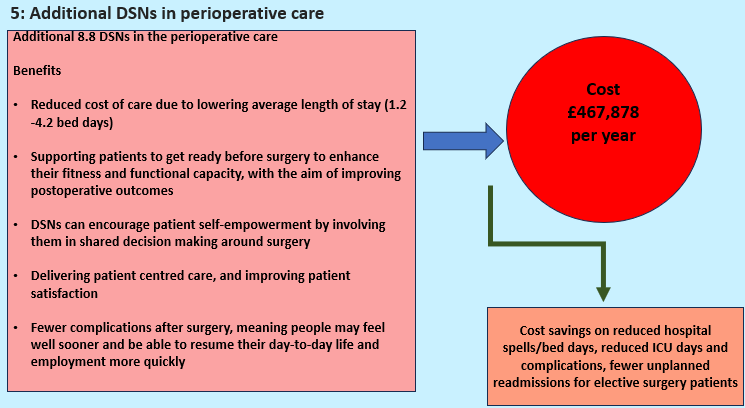


**Table 6.** Indicative cost for additional 8.8 DSNs perioperative care

| **Indicative cost for additional 8.8 DSNs perioperative care** | |
| --- | --- |
| Salary of 1 Band 6 DSN | £67,649 |
| Salary of 3.5 DSNs at UHL | £200,896 |
| Salary of 5.3 DSNs at UHW | £245,522 |
| Evaluation | £10,000 |
| Training | £10,000 |
| Annual Total Cost | £466,419 |

**Figure 7.** Benefits and cost saving of funding a prediabetes NERS pathway


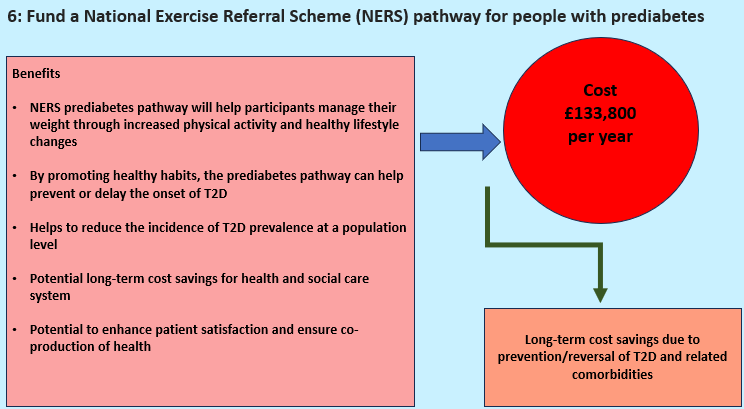


**Table 7.** Indicative cost for funding a prediabetes NERS pathway

| **Indicative cost for funding a prediabetes NERS pathway** | |
| --- | --- |
| Exercise Referral Professional (ERP) x 1: Salary and oncosts (grade 5 - £24,702 - £26,421 – based on top of scale) | £38,000 |
| Recruitment | £1,500 |
| Office space | £1,500 |
| Administration support | £4,000 |
| Management support | £3,000 |
| Laptop, mobile phone, dongle, internet access, licences etc. | £2,000 |
| Extra classes (£25 per hour: 2 classes per centre per week = £200/week) | £10,400 |
| Pool car/Mileage | £2,000 |
| Training | £1,000 |
| Miscellaneous/Contingency | £1,000 |
| Annual Cost for 1 ERP | £64,400 |
| Annual Cost for 2 ERP | £128,800 |
| Marketing cost | £5,000 |
| Annual Total Cost | £133,800 |

1. [↑](#endnote-ref-2)
2. [↑](#endnote-ref-3)
